# Supplementary material for: Recombination rate variation shapes barriers to introgression across butterfly genomes
Source: PubMed Central journal article supplement (PMC6366726; doi:10.1371/journal.pbio.2006288), 2019-02-07
Supplement: pbio.2006288.s014.pdf [file pbio.2006288.s014.pdf]

**S1 Table. Sample and sequencing information**

| sample ID | Sequence ID    | Taxon                        | Country  | Sex | Longitude | Latitude | Accession<br>(ENA, NCBI) | Ref  | Total<br>Gbp | Mean<br>depth |
|-----------|----------------|------------------------------|----------|-----|-----------|----------|--------------------------|------|--------------|---------------|
| CAM025091 | chi.CAM25091   | <i>H. cydno chioneus</i>     | Panama   | f   | 9.1200    | -79.7020 | SAMEA104585050           | [81] | 7.05         | 25.71         |
| CAM025137 | chi.CAM25137   | <i>H. cydno chioneus</i>     | Panama   | f   | 9.1200    | -79.7020 | SAMEA104585051           | [81] | 7.54         | 27.5          |
| CAM000580 | chi.CAM580     | <i>H. cydno chioneus</i>     | Panama   | m   | 9.1200    | -79.7020 | SAMEA104585044           | [81] | 6.16         | 22.45         |
| CAM000582 | chi.CAM582     | <i>H. cydno chioneus</i>     | Panama   | m   | 9.1200    | -79.7020 | SAMEA104585045           | [81] | 6.68         | 24.36         |
| CAM000585 | chi.CAM585     | <i>H. cydno chioneus</i>     | Panama   | m   | 9.1200    | -79.7020 | SAMEA104585047           | [81] | 6.30         | 22.98         |
| CAM000586 | chi.CAM586     | <i>H. cydno chioneus</i>     | Panama   | m   | 9.1200    | -79.7020 | SAMEA104585048           | [81] | 6.37         | 23.24         |
| CAM000553 | chi.CJ553      | <i>H. cydno chioneus</i>     | Panama   | m   | 9.1714    | -79.7573 | SAMEA1919256             | [1]  | 9.69         | 35.33         |
| CAM000560 | chi.CJ560      | <i>H. cydno chioneus</i>     | Panama   | m   | 9.1714    | -79.7573 | SAMEA1919265             | [1]  | 9.55         | 34.84         |
| CAM000564 | chi.CJ564      | <i>H. cydno chioneus</i>     | Panama   | m   | 9.1714    | -79.7573 | SAMEA1919278             | [1]  | 10.63        | 38.75         |
| CAM000565 | chi.CJ565      | <i>H. cydno chioneus</i>     | Panama   | m   | 9.1714    | -79.7573 | SAMEA1919262             | [1]  | 12.50        | 45.58         |
| CS002242  | zel.CS1        | <i>H. cydno zelinde</i>      | Colombia | m   | 3.9394    | -77.3689 | SAMEA104106540           | [49] | 9.88         | 36.04         |
| CS001028  | zel.CS1028     | <i>H. cydno zelinde</i>      | Colombia | m   | 3.9583    | -77.3733 | SAMEA104585054           | [81] | 8.94         | 32.59         |
| CS001029  | zel.CS1029     | <i>H. cydno zelinde</i>      | Colombia | m   | 3.9394    | -77.3689 | SAMEA104585055           | [81] | 6.70         | 24.44         |
| CS001030  | zel.CS1030     | <i>H. cydno zelinde</i>      | Colombia | m   | 3.9394    | -77.3689 | SAMEA104585056           | [81] | 7.35         | 26.8          |
| CS001033  | zel.CS1033     | <i>H. cydno zelinde</i>      | Colombia | m   | 3.9583    | -77.3733 | SAMEA104585057           | [81] | 7.73         | 28.18         |
| CS001035  | zel.CS1035     | <i>H. cydno zelinde</i>      | Colombia | m   | 3.9583    | -77.3733 | SAMEA104585058           | [81] | 8.32         | 30.34         |
| CS002261  | zel.CS2        | <i>H. cydno zelinde</i>      | Colombia | m   | 3.9394    | -77.3689 | SAMEA104106542           | [49] | 9.10         | 33.2          |
| CS002262  | zel.CS2262     | <i>H. cydno zelinde</i>      | Colombia | f   | 3.9583    | -77.3733 | SAMEA3670517             | [49] | 4.91         | 17.91         |
| CS000273  | zel.CS273      | <i>H. cydno zelinde</i>      | Colombia | m   | 3.9583    | -77.3733 | SAMEA104585059           | [81] | 7.11         | 25.93         |
| CS002260  | zel.CS30       | <i>H. cydno zelinde</i>      | Colombia | f   | 3.9394    | -77.3689 | SAMEA104106543           | [49] | 11.35        | 41.38         |
| JM-09-313 | thxn.JM313     | <i>H. timareta thelxinoe</i> | Peru     | m   | -6.4584   | -76.2877 | SAMEA1919266             | [1]  | 9.84         | 35.89         |
| JM-09-57  | thxn.JM57      | <i>H. timareta thelxinoe</i> | Peru     | m   | -6.4528   | -76.2987 | SAMEA1919254             | [1]  | 12.52        | 45.64         |
| JM-09-84  | thxn.JM84      | <i>H. timareta thelxinoe</i> | Peru     | m   | -6.4528   | -76.2987 | SAMEA1919273             | [1]  | 8.72         | 31.8          |
| JM-09-86  | thxn.JM86      | <i>H. timareta thelxinoe</i> | Peru     | m   | -6.4528   | -76.2987 | SAMEA1919263             | [1]  | 11.06        | 40.33         |
| MJ12-3221 | thxn.MJ12-3221 | <i>H. timareta thelxinoe</i> | Peru     | m   | -5.6546   | -77.6938 | SAMEA104585110           | [81] | 6.74         | 24.58         |
| MJ12-3233 | thxn.MJ12-3233 | <i>H. timareta thelxinoe</i> | Peru     | m   | -6.4519   | -76.2985 | SAMEA104585111           | [81] | 6.80         | 24.79         |
| MJ12-3308 | thxn.MJ12-3308 | <i>H. timareta thelxinoe</i> | Peru     | m   | -5.6546   | -77.6938 | SAMEA104585112           | [81] | 6.57         | 23.95         |
| MJ11-3339 | txn.MJ11-3339  | <i>H. timareta</i>           | Peru     | m   | -5.6546   | -77.6938 | SAMEA104585113           | [81] | 7.25         | 26.43         |

|           |               |                                  |          |   |         |          |                |      |       |       |  |
|-----------|---------------|----------------------------------|----------|---|---------|----------|----------------|------|-------|-------|--|
|           |               | <i>thelxinoe</i>                 |          |   |         |          |                |      |       |       |  |
| MJ11-3340 | txn.MJ11-3340 | <i>H. timareta<br/>thelxinoe</i> | Peru     | m | -5.6546 | -77.6938 | SAMEA104585114 | [81] | 6.34  | 23.12 |  |
| MJ11-3460 | txn.MJ12-3460 | <i>H. timareta<br/>thelxinoe</i> | Peru     | m | -5.6546 | -77.6938 | SAMEA104585115 | [81] | 10.55 | 38.46 |  |
| CS002395  | flo.CS12      | <i>H. timareta<br/>florencia</i> | Colombia | m | 1.7097  | -75.6976 | SAMEA104585100 | [81] | 7.77  | 28.35 |  |
| CS002402  | flo.CS13      | <i>H. timareta<br/>florencia</i> | Colombia | m | 1.7097  | -75.6976 | SAMEA104585101 | [81] | 7.41  | 27.03 |  |
| CS002403  | flo.CS14      | <i>H. timareta<br/>florencia</i> | Colombia | m | 1.7097  | -75.6976 | SAMEA104585102 | [81] | 8.34  | 30.4  |  |
| CS002406  | flo.CS15      | <i>H. timareta<br/>florencia</i> | Colombia | m | 1.7097  | -75.6976 | SAMEA104585103 | [81] | 8.30  | 30.27 |  |
| CS002337  | flo.CS2337    | <i>H. timareta<br/>florencia</i> | Colombia | m | 1.7108  | -75.7089 | SAMEA104585104 | [81] | 11.99 | 43.74 |  |
| CS002338  | flo.CS2338    | <i>H. timareta<br/>florencia</i> | Colombia | m | 1.7108  | -75.7089 | SAMEA104585105 | [81] | 6.48  | 23.63 |  |
| CS002341  | flo.CS2341    | <i>H. timareta<br/>florencia</i> | Colombia | m | 1.8136  | -75.6686 | SAMEA104585106 | [81] | 7.90  | 28.81 |  |
| CS002350  | flo.CS2350    | <i>H. timareta<br/>florencia</i> | Colombia | m | 1.7108  | -75.7089 | SAMEA104585107 | [81] | 6.73  | 24.53 |  |
| CS002358  | flo.CS2358    | <i>H. timareta<br/>florencia</i> | Colombia | m | 1.7108  | -75.7089 | SAMEA104585108 | [81] | 7.16  | 26.12 |  |
| CS002359  | flo.CS2359    | <i>H. timareta<br/>florencia</i> | Colombia | m | 1.7108  | -75.7089 | SAMEA104585109 | [81] | 6.33  | 23.07 |  |
| CAM001841 | ros.CAM1841   | <i>H. melpomene<br/>rosina</i>   | Panama   | m | 9.0760  | -79.6590 | SAMEA104585083 | [81] | 7.53  | 27.47 |  |
| CAM001880 | ros.CAM1880   | <i>H. melpomene<br/>rosina</i>   | Panama   | m | 9.0760  | -79.6590 | SAMEA104585084 | [81] | 8.39  | 30.59 |  |
| CAM002045 | ros.CAM2045   | <i>H. melpomene<br/>rosina</i>   | Panama   | m | 9.1103  | -79.6907 | SAMEA104585085 | [81] | 6.24  | 22.76 |  |
| CAM002059 | ros.CAM2059   | <i>H. melpomene<br/>rosina</i>   | Panama   | m | 9.1103  | -79.6907 | SAMEA104585086 | [81] | 7.05  | 25.7  |  |
| CAM002519 | ros.CAM2519   | <i>H. melpomene<br/>rosina</i>   | Panama   | m | 9.0109  | -79.5477 | SAMEA104585087 | [81] | 7.68  | 28    |  |
| CAM002552 | ros.CAM2552   | <i>H. melpomene<br/>rosina</i>   | Panama   | m | 9.0109  | -79.5477 | SAMEA104585088 | [81] | 6.53  | 23.83 |  |
| CAM002071 | ros.CJ2071    | <i>H. melpomene<br/>rosina</i>   | Panama   | m | 9.1206  | -79.6969 | SAMEA1919257   | [1]  | 10.08 | 36.77 |  |
| CAM000531 | ros.CJ531     | <i>H. melpomene<br/>rosina</i>   | Panama   | m | 9.1206  | -79.6969 | SAMEA1919271   | [1]  | 7.36  | 26.83 |  |
| CAM000533 | ros.CJ533     | <i>H. melpomene<br/>rosina</i>   | Panama   | m | 9.1206  | -79.6969 | SAMEA1919260   | [1]  | 7.31  | 26.68 |  |
| CAM000546 | ros.CJ546     | <i>H. melpomene<br/>rosina</i>   | Panama   | m | 9.1206  | -79.6969 | SAMEA1919279   | [1]  | 7.25  | 26.43 |  |
| CS000710  | vul.CS10      | <i>H. melpomene<br/>vulcanus</i> | Colombia | m | 3.9000  | -76.6325 | SAMEA3723391   | [49] | 9.76  | 35.59 |  |
| CS003603  | vul.CS3603    | <i>H. melpomene<br/>vulcanus</i> | Colombia | m | 3.5175  | -76.7572 | SAMEA104585091 | [81] | 8.30  | 30.25 |  |
| CS003605  | vul.CS3605    | <i>H. melpomene<br/>vulcanus</i> | Colombia | m | 3.5175  | -76.7572 | SAMEA104585092 | [81] | 7.55  | 27.55 |  |
| CS003606  | vul.CS3606    | <i>H. melpomene<br/>vulcanus</i> | Colombia | m | 3.5175  | -76.7572 | SAMEA104585093 | [81] | 7.31  | 26.66 |  |
| CS003612  | vul.CS3612    | <i>H. melpomene<br/>vulcanus</i> | Colombia | m | 3.5175  | -76.7572 | SAMEA104585094 | [81] | 9.07  | 33.06 |  |
| CS003614  | vul.CS3614    | <i>H. melpomene<br/>vulcanus</i> | Colombia | m | 3.5175  | -76.7572 | SAMEA104585095 | [81] | 7.49  | 27.33 |  |
| CS003615  | vul.CS3615    | <i>H. melpomene<br/>vulcanus</i> | Colombia | m | 3.5175  | -76.7572 | SAMEA104585096 | [81] | 6.44  | 23.5  |  |

|           |               |                               |               |   |         |          |                |      |       |       |
|-----------|---------------|-------------------------------|---------------|---|---------|----------|----------------|------|-------|-------|
| CS003617  | vul.CS3617    | <i>H. melpomene vulcanus</i>  | Colombia      | m | 3.5175  | -76.7572 | SAMEA104585097 | [81] | 6.92  | 25.22 |
| CS003618  | vul.CS3618    | <i>H. melpomene vulcanus</i>  | Colombia      | m | 3.5175  | -76.7572 | SAMEA104585098 | [81] | 6.92  | 25.24 |
| CS003621  | vul.CS3621    | <i>H. melpomene vulcanus</i>  | Colombia      | m | 3.5175  | -76.7572 | SAMEA104585099 | [81] | 6.25  | 22.8  |
| CS001002  | mal.CS1002    | <i>H. melpomene malleti</i>   | Colombia      | m | 1.8033  | -75.6553 | SAMEA104585067 | [81] | 6.27  | 22.85 |
| CS001011  | mal.CS1011    | <i>H. melpomene malleti</i>   | Colombia      | m | 1.8033  | -75.6553 | SAMEA104585068 | [81] | 7.76  | 28.29 |
| CS001815  | mal.CS1815    | <i>H. melpomene malleti</i>   | Colombia      | m | 1.8033  | -75.6553 | SAMEA104585069 | [81] | 5.82  | 21.21 |
| CS002311  | mal.CS21      | <i>H. melpomene malleti</i>   | Colombia      | m | 1.8136  | -75.6686 | SAMEA3723397   | [49] | 9.75  | 35.56 |
| CS001286  | mal.CS22      | <i>H. melpomene malleti</i>   | Colombia      | m | 1.6097  | -75.6669 | SAMEA3723398   | [49] | 8.78  | 32.01 |
| CS001321  | mal.CS24      | <i>H. melpomene malleti</i>   | Colombia      | m | 1.7506  | -75.6319 | SAMEA3723399   | [49] | 7.47  | 27.25 |
| CS000586  | mal.CS586     | <i>H. melpomene malleti</i>   | Colombia      | m | 1.8033  | -75.6553 | SAMEA104585071 | [81] | 6.55  | 23.87 |
| CS000594  | mal.CS594     | <i>H. melpomene malleti</i>   | Colombia      | f | 1.8033  | -75.6553 | SAMEA104585072 | [81] | 9.36  | 34.12 |
| CS000604  | mal.CS604     | <i>H. melpomene malleti</i>   | Colombia      | m | 1.8033  | -75.6553 | SAMEA104585073 | [81] | 6.99  | 25.48 |
| CS000615  | mal.CS615     | <i>H. melpomene malleti</i>   | Colombia      | m | 1.8033  | -75.6553 | SAMEA104585074 | [81] | 5.93  | 21.62 |
| JM-11-160 | ama.JM160     | <i>H. melpomene amaryllis</i> | Peru          | f | -5.6756 | -77.6747 | SAMEA1919261   | [1]  | 12.08 | 44.05 |
| JM-09-216 | ama.JM216     | <i>H. melpomene amaryllis</i> | Peru          | m | -6.4685 | -76.3533 | SAMEA1919261   | [1]  | 8.89  | 32.41 |
| JM-11-293 | ama.JM293     | <i>H. melpomene amaryllis</i> | Peru          | f | -6.4703 | -76.3473 | SAMEA1919277   | [1]  | 14.67 | 53.5  |
| JM-11-48  | ama.JM48      | <i>H. melpomene amaryllis</i> | Peru          | m | -6.0960 | -76.9774 | SAMEA1919269   | [1]  | 15.30 | 55.81 |
| MJ11-3188 | ama.MJ11-3188 | <i>H. melpomene amaryllis</i> | Peru          | m | -5.6728 | -77.7195 | SAMEA104585061 | [81] | 6.87  | 25.05 |
| MJ11-3189 | ama.MJ11-3189 | <i>H. melpomene amaryllis</i> | Peru          | m | -5.6728 | -77.7195 | SAMEA104585062 | [81] | 7.66  | 27.95 |
| MJ11-3202 | ama.MJ11-3202 | <i>H. melpomene amaryllis</i> | Peru          | m | -5.6745 | -77.6711 | SAMEA104585063 | [81] | 6.19  | 22.58 |
| MJ12-3217 | ama.MJ12-3217 | <i>H. melpomene amaryllis</i> | Peru          | m | -6.4547 | -76.2994 | SAMEA104585064 | [81] | 7.04  | 25.67 |
| MJ12-3258 | ama.MJ12-3258 | <i>H. melpomene amaryllis</i> | Peru          | m | -6.4530 | -76.2876 | SAMEA104585065 | [81] | 6.79  | 24.77 |
| MJ12-3301 | ama.MJ12-3301 | <i>H. melpomene amaryllis</i> | Peru          | m | -6.4528 | -76.2862 | SAMEA104585066 | [81] | 6.39  | 23.29 |
| CAM001349 | melG.CAM1349  | <i>H. melpomene melpomene</i> | French Guiana | f | 2.5222  | -51.1934 | SAMEA104585075 | [81] | 6.44  | 23.49 |
| CAM001422 | melG.CAM1422  | <i>H. melpomene melpomene</i> | French Guiana | m | 2.5222  | -51.1934 | SAMEA104585076 | [81] | 10.00 | 36.47 |
| CAM002035 | melG.CAM2035  | <i>H. melpomene melpomene</i> | French Guiana | m | 2.5222  | -51.1934 | SAMEA104585077 | [81] | 7.19  | 26.24 |
| CAM008171 | melG.CAM8171  | <i>H. melpomene melpomene</i> | French Guiana | f | 2.5222  | -51.1934 | SAMEA104585078 | [81] | 7.01  | 25.57 |
| CAM008216 | melG.CAM8216  | <i>H. melpomene melpomene</i> | French Guiana | m | 2.5222  | -51.1934 | SAMEA104585080 | [81] | 7.84  | 28.57 |
| CAM008218 | melG.CAM8218  | <i>H. melpomene melpomene</i> | French Guiana | m | 2.5222  | -51.1934 | SAMEA104585081 | [81] | 6.24  | 22.74 |
| CAM013435 | melG.CJ13435  | <i>H. melpomene melpomene</i> | French Guiana | m | 2.5222  | -51.1934 | SAMEA1919276   | [1]  | 9.82  | 35.81 |

|           |             |                               |               |   |        |          |              |      |      |       |
|-----------|-------------|-------------------------------|---------------|---|--------|----------|--------------|------|------|-------|
| CAM009315 | meIG.CJ9315 | <i>H. melpomene melpomene</i> | French Guiana | m | 2.5222 | -51.1934 | SAMEA1919270 | [1]  | 6.65 | 24.26 |
| CAM009316 | meIG.CJ9316 | <i>H. melpomene melpomene</i> | French Guiana | m | 2.5222 | -51.1934 | SAMEA1919252 | [1]  | 6.35 | 23.15 |
| CAM009317 | meIG.CJ9317 | <i>H. melpomene melpomene</i> | French Guiana | m | 2.5222 | -51.1934 | SAMEA1919267 | [1]  | 9.64 | 35.14 |
| MJ09-4125 | MJ09.4125   | <i>H. numata numata</i>       | French Guiana |   | 4.0833 | -52.6753 | SAMEA3888884 | [65] | 6.31 | 22    |
| MJ09-4184 | MJ09.4184   | <i>H. numata silvana</i>      | French Guiana |   | 4.0834 | -52.6753 | SAMEA3888889 | [65] | 7.71 | 27.11 |
