# Supplementary material for: Recombination rate variation shapes barriers to introgression across butterfly genomes
Source: PubMed Central journal article supplement (PMC6366726; doi:10.1371/journal.pbio.2006288), 2019-02-07
Supplement: pbio.2006288.s015.pdf [file pbio.2006288.s015.pdf]

## S2 Table. Correlations between admixture proportion ( $f_d$ ) and recombination rate

### A. Population recombination rate ( $\rho$ )

|                     | population set           | all windows    |                  | thinned windows |                 |
|---------------------|--------------------------|----------------|------------------|-----------------|-----------------|
|                     |                          | Spearman's rho | p-value          | Spearman's rho  | p-value         |
| whole genome        | 1 ( <i>cyd / mel-W</i> ) | 0.346          | <b>1.13E-73</b>  | 0.351           | <b>4.09E-39</b> |
|                     | 4 ( <i>tim / mel-E</i> ) | 0.484          | <b>2.43E-152</b> | 0.494           | <b>8.17E-81</b> |
| intermediate rec.   | 1 ( <i>cyd / mel-W</i> ) | 0.188          | <b>3.77E-14</b>  | 0.158           | <b>4.63E-06</b> |
|                     | 4 ( <i>tim / mel-E</i> ) | 0.279          | <b>1.06E-29</b>  | 0.298           | <b>1.11E-17</b> |
| fused chromosomes   | 1 ( <i>cyd / mel-W</i> ) | 0.288          | <b>2.05E-32</b>  | 0.299           | <b>2.38E-18</b> |
|                     | 4 ( <i>tim / mel-E</i> ) | 0.437          | <b>5.02E-76</b>  | 0.439           | <b>1.86E-39</b> |
| unfused chromosomes | 1 ( <i>cyd / mel-W</i> ) | 0.303          | <b>1.79E-22</b>  | 0.322           | <b>1.16E-13</b> |
|                     | 4 ( <i>tim / mel-E</i> ) | 0.431          | <b>8.00E-46</b>  | 0.450           | <b>3.33E-26</b> |

### B. Crossover recombination rate

|                     | population set           | all windows    |                 | thinned windows |                 |
|---------------------|--------------------------|----------------|-----------------|-----------------|-----------------|
|                     |                          | Spearman's rho | p-value         | Spearman's rho  | p-value         |
| whole genome        | 1 ( <i>cyd / mel-W</i> ) | 0.280          | <b>4.17E-48</b> | 0.261           | <b>5.54E-22</b> |
|                     | 4 ( <i>tim / mel-E</i> ) | 0.349          | <b>2.69E-75</b> | 0.358           | <b>9.58E-41</b> |
| intermediate rec.   | 1 ( <i>cyd / mel-W</i> ) | 0.129          | <b>1.52E-07</b> | 0.078           | <b>1.40E-02</b> |
|                     | 4 ( <i>tim / mel-E</i> ) | 0.146          | <b>3.14E-09</b> | 0.138           | <b>5.78E-05</b> |
| fused chromosomes   | 1 ( <i>cyd / mel-W</i> ) | 0.189          | <b>1.14E-14</b> | 0.190           | <b>2.94E-08</b> |
|                     | 4 ( <i>tim / mel-E</i> ) | 0.260          | <b>1.58E-26</b> | 0.259           | <b>3.96E-14</b> |
| unfused chromosomes | 1 ( <i>cyd / mel-W</i> ) | 0.197          | <b>2.67E-10</b> | 0.175           | <b>4.88E-05</b> |
|                     | 4 ( <i>tim / mel-E</i> ) | 0.202          | <b>9.49E-11</b> | 0.211           | <b>1.23E-06</b> |
